# Supplementary material
Source: publisher site journal article supplement (https://www.dovepress.com/article/400472)
Supplement: Supplementary file 1 [file get_supplementary_file.php]

**Supplementary Tables**

**Table S1. Clinical information of HCC patients in the TCGA and GSE14520 cohorts**

| Category | Subcategory | TCGA (n = 370) | GSE14520 (n=221) |
| --- | --- | --- | --- |
| Age, years | ≤ 60 | 174 | 181 |
|  | >60 | 176 | 40 |
| Gender | Female | 111 | 30 |
|  | Male | 239 | 191 |
| Pathological grade | G1 | 46 | NA |
|  | G2 | 171 | NA |
|  | G3 | 120 | NA |
|  | G4 | 13 | NA |
| Clinical stage | I | 174 | 93 |
|  | II | 85 | 77 |
|  | III | 86 | 49 |
|  | IV | 5 | 0 |
|  | Unknown | 0 | 2 |
| T | T1 | 175 | NA |
|  | T2 | 87 | NA |
|  | T3 | 77 | NA |
|  | T4 | 10 | NA |
|  | Unknown | 1 | NA |
| N | N0 | 256 | NA |
|  | N1 | 4 | NA |
|  | NX/Unknown | 90 | NA |
| M | M0 | 268 | NA |
|  | M1 | 4 | NA |
|  | MX/Unknown | 78 | NA |
| Tumor size, cm | ≤ 5 | NA | 141 |
|  | >5 | NA | 80 |
| Tumor number | Single | NA | 176 |
|  | Multiple | NA | 45 |

NA, not available.

**Table S2. The glycosylation-related gene list**

| Glycosylation-related genes (n = 184) | | | | |
| --- | --- | --- | --- | --- |
| ALG1 | MAN1C1 | B3GLCT | GCNT4 | SLC35C1 |
| ALG10 | MCFD2 | B3GNT2 | GXYLT1 | SLC35C2 |
| ALG10B | MGAT1 | B3GNT3 | GXYLT2 | ST3GAL2 |
| ALG11 | MGAT2 | B3GNT4 | IL15 | ST3GAL3 |
| ALG12 | MGAT3 | B3GNT5 | LARGE1 | ST3GAL4 |
| ALG13 | MGAT4A | B3GNT6 | LARGE2 | ST6GALNAC2 |
| ALG14 | MGAT4B | B3GNT7 | MUC1 | ST6GALNAC4 |
| ALG2 | MGAT4C | B3GNT8 | MUC12 | ST8SIA6 |
| ALG3 | MGAT4D | B4GALT5 | MUC13 | TET1 |
| ALG5 | MGAT5 | B4GAT1 | MUC15 | TET2 |
| ALG6 | MGAT5B | C1GALT1 | MUC16 | TET3 |
| ALG8 | MOGS | C1GALT1C1 | MUC17 | TMTC1 |
| ALG9 | MPDU1 | C1GALT1C1L | MUC19 | TMTC2 |
| ASGR1 | MVD | CHST4 | MUC2 | TMTC3 |
| ASGR2 | NUDT14 | CRPPA | MUC20 | TMTC4 |
| B4GALNT2 | NUS1 | EOGT | MUC21 | TRAK1 |
| B4GALT1 | OST4 | FKRP | MUC3A | TRAK2 |
| B4GALT7 | OSTC | FKTN | MUC4 | VEGFB |
| DAD1 | PGM3 | GALNT1 | MUC5AC | XXYLT1 |
| DDOST | PMM1 | GALNT10 | MUC5B | DPY19L1 |
| DERL3 | PMM2 | GALNT11 | MUC6 | DPY19L2 |
| DHDDS | RFT1 | GALNT12 | MUC7 | DPY19L3 |
| DOLK | RPN1 | GALNT13 | MUCL1 | DPY19L4 |
| DOLPP1 | RPN2 | GALNT14 | OGA | ABCA2 |
| DPAGT1 | SLC39A8 | GALNT15 | OGT | ACER2 |
| DPM1 | SRD5A3 | GALNT16 | PLOD3 | ARFGEF1 |
| DPM2 | ST3GAL1 | GALNT18 | POFUT1 | CHP1 |
| DPM3 | ST6GAL1 | GALNT2 | POFUT2 | GOLGA2 |
| ENTPD5 | STT3A | GALNT3 | POGLUT1 | MT3 |
| EXT2 | STT3B | GALNT4 | POGLUT2 | RAMP1 |
| FUT8 | TMEM165 | GALNT5 | POGLUT3 | SLC51B |
| GAL3ST1 | TMEM258 | GALNT6 | POMGNT1 | TMEM59 |
| GFPT1 | TUSC3 | GALNT7 | POMGNT2 | |
| GFPT2 | UBE2J1 | GALNT8 | POMK |  |
| GORASP1 | UGGT1 | GALNT9 | POMT1 |  |
| KRTCAP2 | UGGT2 | GALNTL6 | POMT2 |  |
| LMAN1 | A4GNT | GCNT1 | RXYLT1 |  |
| MAGT1 | B3GALNT2 | GCNT3 | SDF2L1 |  |

**Table S3. The common glycosylation-related genes in the TCGA and GSE14520 datasets**

| Glycosylation-related genes (n = 108) | | | | | |
| --- | --- | --- | --- | --- | --- |
| ALG12 | DPM3 | MPDU1 | B4GALT5 | GCNT4 | SDF2L1 |
| ALG13 | ENTPD5 | MVD | C1GALT1 | IL15 | SLC35C1 |
| ALG3 | EXT2 | PGM3 | C1GALT1C1 | MUC1 | SLC35C2 |
| ALG5 | FUT8 | PMM1 | CHST4 | MUC13 | ST3GAL2 |
| ALG6 | GAL3ST1 | PMM2 | FKRP | MUC16 | ST3GAL4 |
| ALG8 | GFPT1 | RPN1 | GALNT1 | MUC2 | ST6GALNAC2 |
| ALG9 | GFPT2 | RPN2 | GALNT10 | MUC3A | ST6GALNAC4 |
| ASGR1 | GORASP1 | SLC39A8 | GALNT11 | MUC4 | TRAK1 |
| ASGR2 | LMAN1 | ST3GAL1 | GALNT12 | MUC5AC | TRAK2 |
| B4GALT1 | MAN1C1 | ST6GAL1 | GALNT14 | MUC6 | VEGFB |
| B4GALT7 | MCFD2 | STT3A | GALNT2 | MUC7 | DPY19L1 |
| DAD1 | MGAT1 | TMEM165 | GALNT3 | OGT | DPY19L4 |
| DDOST | MGAT2 | TUSC3 | GALNT4 | PLOD3 | ABCA2 |
| DHDDS | MGAT3 | UBE2J1 | GALNT6 | POFUT1 | ARFGEF1 |
| DOLPP1 | MGAT4A | A4GNT | GALNT7 | POFUT2 | GOLGA2 |
| DPAGT1 | MGAT4B | B3GNT2 | GALNT8 | POMGNT1 | MT3 |
| DPM1 | MGAT4C | B3GNT3 | GCNT1 | POMT1 | RAMP1 |
| DPM2 | MGAT5 | B3GNT4 | GCNT3 | POMT2 | TMEM59 |
